# Supplementary material for: Incidence of malignancy and related mortality after kidney transplantation: a nationwide, population-based cohort study in Korea
Source: PubMed Central journal article supplement (PMC7722878; doi:10.1038/s41598-020-78283-5), 2020-12-08
Supplement: 41598_2020_78283_MOESM1_ESM.pdf [file 41598_2020_78283_MOESM1_ESM.pdf]

## Supplementary Information

### **Incidence of malignancy and related mortality after kidney transplantation: A nationwide, population-based cohort study in Korea**

Seri Jeong<sup>1</sup>, Ho Sup Lee<sup>2</sup>, Seom Gim Kong<sup>3</sup>, Da Jung Kim<sup>2</sup>, Sangjin Lee<sup>4</sup>, Min-Jeong Park<sup>1</sup>, Wonkeun Song<sup>1</sup>, John Hoon Rim<sup>5,6</sup> & Hyung Jik Kim<sup>7\*</sup>

<sup>1</sup>Department of Laboratory Medicine, Kangnam Sacred Heart Hospital, Hallym University College of Medicine, Seoul, 07441, South Korea. <sup>2</sup>Department of Hematology-Oncology, Kosin University College of Medicine, Busan, 49267, South Korea. <sup>3</sup>Department of Pediatrics, Kosin University College of Medicine, Busan, 49267, South Korea. <sup>4</sup>Graduate School, Department of Statistics, Pusan National University, Busan, 46241, South Korea. <sup>5</sup>Department of Pharmacology, Yonsei University College of Medicine, Seoul, 03722, South Korea. <sup>6</sup>Department of Medicine, Physician-Scientist Program, Yonsei University Graduate School of Medicine, Seoul, 03722, South Korea. <sup>7</sup>Department of Internal Medicine, Hallym University Sacred Heart Hospital, Hallym University College of Medicine, Anyang, 14068, South Korea.

\* Corresponding author: Hyung Jik Kim

Department of Internal Medicine, Hallym University Sacred Heart Hospital, Hallym

University College of Medicine, 22, Gwanpyeong-ro 170 beon-gil, Dongan-gu, 14068,  
Anyang-si, Gyeonggi-do, South Korea.

Tel: (+82) 31-380-3720, Fax: (+82) 31-386-2269

E-mail: hyung@hallym.or.kr

### **Supplemental table and figure legends**

**Supplementary Figure S1.** Plots of scaled Schoenfeld residuals test for proportional hazards assumption.

**Supplementary Figure S2.** Flow chart of patient selection.

**Supplementary Table S1.** Standardised incidence ratios of total, and the major types of post-transplant malignancies according to the age classes.

Supplementary Figure S1.

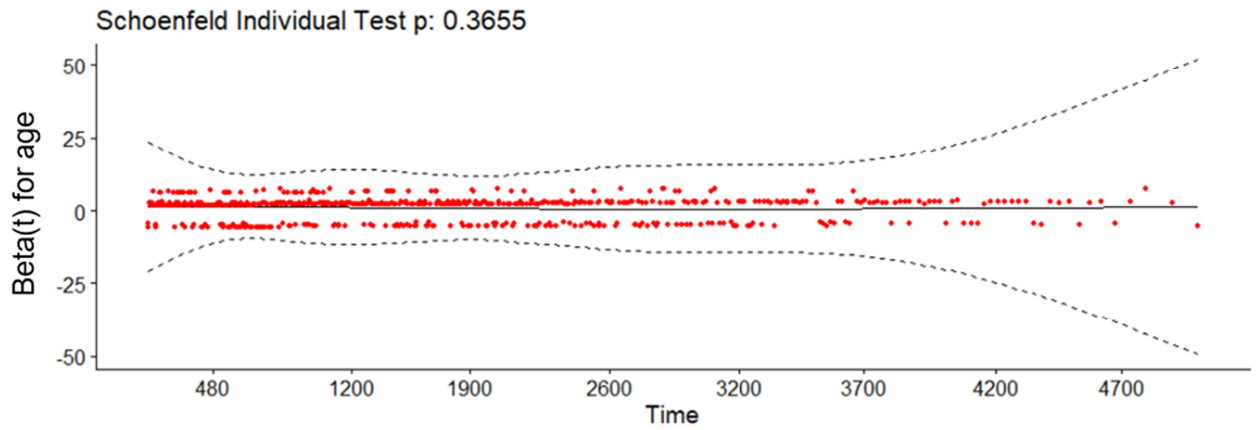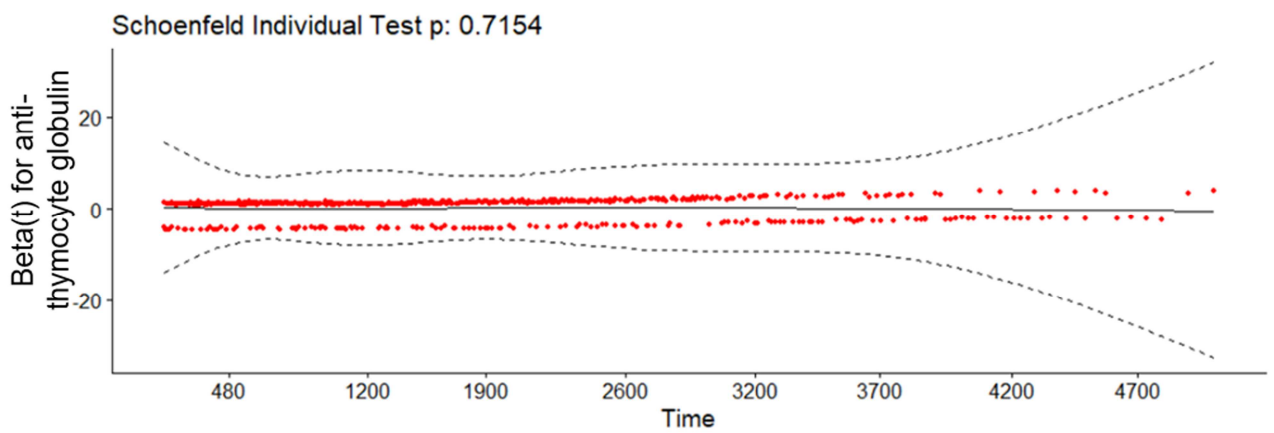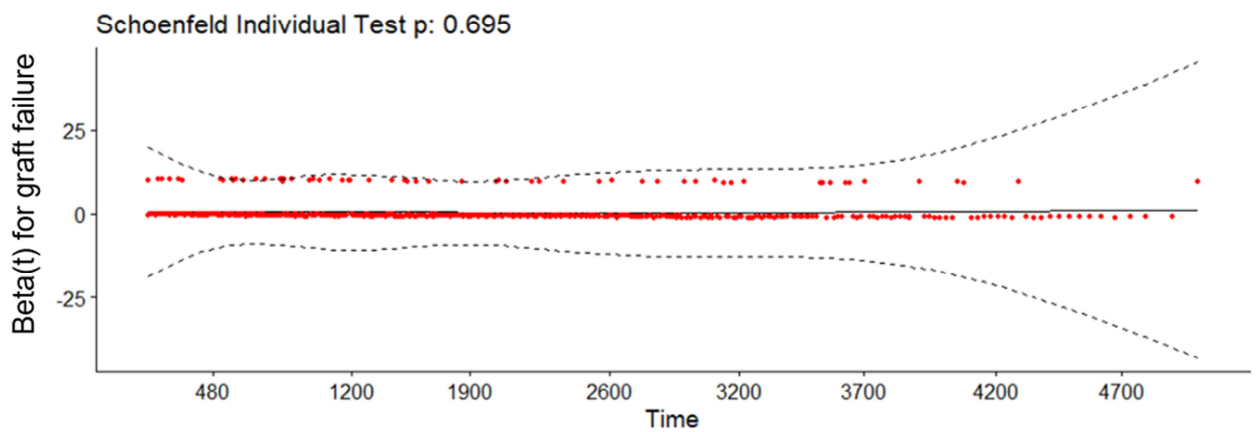

## Supplementary Figure S2.

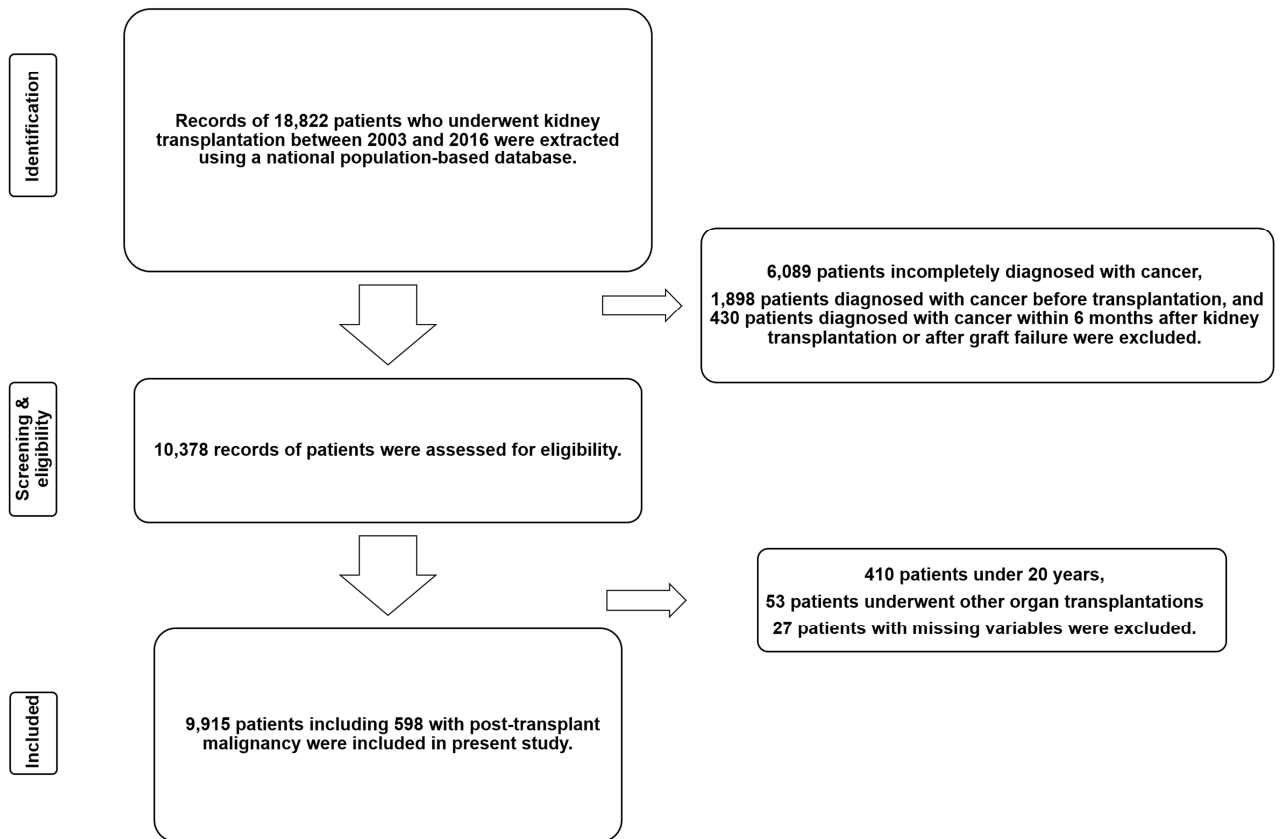

| Type of cancer           | Observed rates of cancer cases |        |        | Expected rates of cancer cases |        |        | Standardised incidence ratio (95% CI) |                     |                    |
|--------------------------|--------------------------------|--------|--------|--------------------------------|--------|--------|---------------------------------------|---------------------|--------------------|
|                          | Male                           | Female | Total  | Male                           | Female | Total  | Male                                  | Female              | Total              |
| <b>Total cancer</b>      |                                |        |        |                                |        |        |                                       |                     |                    |
| <40                      | 643.1                          | 962.8  | 769.1  | 26.7                           | 69.9   | 47.9   | 24.0 (22.2-26.0)                      | 13.8 (12.9-14.7)    | 16.1 (14.9-17.2)   |
| 40-59                    | 1242.7                         | 1303.7 | 1267.7 | 431.9                          | 496.3  | 463.2  | 2.9 (2.7-3.0)                         | 2.6 (2.5-2.8)       | 2.7 (2.6-2.9)      |
| > 59                     | 1797.4                         | 1400.6 | 1644.4 | 2237.8                         | 950.9  | 1413.8 | 0.8 (0.8-0.8)                         | 1.5 (1.4-1.6)       | 1.2 (1.1-1.2)      |
| <b>Thyroid cancer</b>    |                                |        |        |                                |        |        |                                       |                     |                    |
| <40                      | 66.0                           | 240.7  | 134.9  | 7.6                            | 34.7   | 20.8   | 8.7 (6.7-11.0)                        | 6.9 (6.1-7.9)       | 6.5 (5.4-7.7)      |
| 40-59                    | 102.6                          | 246.0  | 161.4  | 30.8                           | 159.4  | 94.6   | 3.3 (2.7-4.0)                         | 1.5 (1.4-1.7)       | 1.7 (1.4-2.0)      |
| > 59                     | 159.8                          | 382.0  | 245.4  | 19.4                           | 63.9   | 44.0   | 8.2 (7.0-9.6)                         | 6.0 (5.4-6.6)       | 5.6 (4.9-6.3)      |
| <b>Colorectal cancer</b> |                                |        |        |                                |        |        |                                       |                     |                    |
| <40                      | 74.2                           | 139.4  | 99.9   | 2.8                            | 2.3    | 2.5    | 26.6 (20.8-33.2)                      | 61.4 (51.5-72.4)    | 40.0 (32.4-48.4)   |
| 40-59                    | 125.4                          | 155.8  | 137.9  | 68.9                           | 42.4   | 55.7   | 1.8 (1.5-2.2)                         | 3.7 (3.1-4.3)       | 2.5 (2.1-2.9)      |
| > 59                     | 119.8                          | 191.0  | 147.3  | 316.5                          | 163.5  | 220.5  | 0.4 (0.3-0.5)                         | 1.2 (1.0-1.3)       | 0.7 (0.6-0.8)      |
| <b>Kidney cancer</b>     |                                |        |        |                                |        |        |                                       |                     |                    |
| <40                      | 115.4                          | 88.7   | 104.9  | 1.2                            | 0.7    | 0.9    | 95.1 (78.2-113.7)                     | 132.4 (106.1-162.7) | 110.8 (90.3-133.7) |
| 40-59                    | 159.6                          | 90.2   | 131.1  | 14.9                           | 5.7    | 10.3   | 10.7 (9.1-12.5)                       | 15.8 (12.7-19.4)    | 12.7 (10.6-15.1)   |
| > 59                     | 159.8                          | 0.0    | 98.2   | 41.9                           | 15.1   | 25.1   | 3.8 (3.2-4.4)                         | 0.0                 | 3.9 (3.2-4.8)      |

**Supplementary Table S1.** Standardised incidence ratios of total, and major types of post-transplant malignancies according to the age classes.

CI, confidence interval.
